# Supplementary material for: Brain-wide visual habituation networks in wild type and fmr1 zebrafish
Source: PubMed Central journal article supplement (PMC8850451; doi:10.1038/s41467-022-28299-4), 2022-02-16
Supplement: 41467_2022_28299_MOESM4_ESM.pdf [file 41467_2022_28299_MOESM4_ESM.pdf]

Title: Supplementary Movie 1

Description: Anatomical locations for the ROIs belonging to each functional cluster. 3D rotation of Figure 2h.
